# Supplementary material
Source: Springer Nature journal article supplement (https://www.springerprofessional.de/resource/supplementary/40493_2013_3_MOESM1_ESM.pdf/11899614)

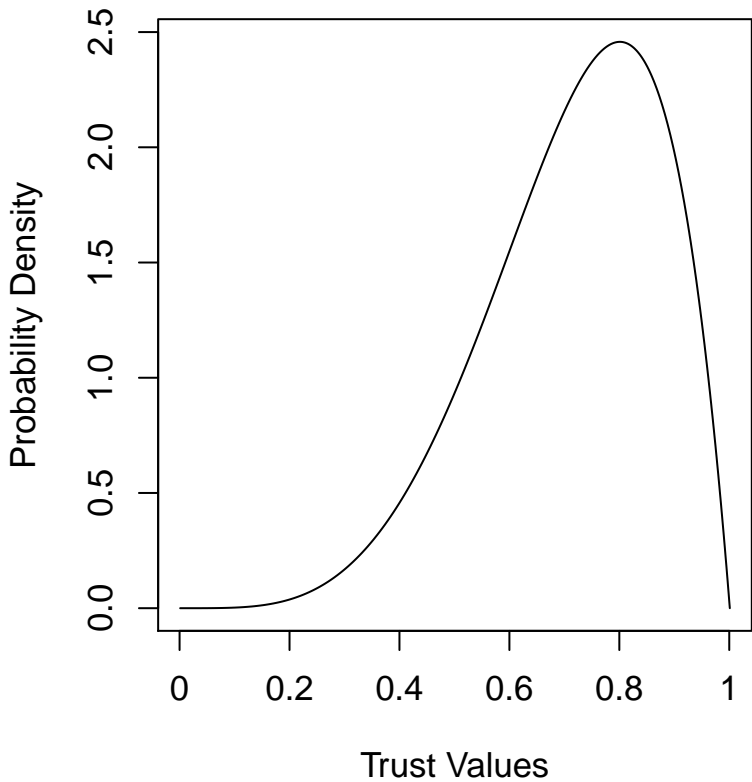

Supplement: MOESM1 [file 11899614]
